# Supplementary material for: Induced Endothelial Cell-Integrated Liver Assembloids Promote Hepatic Maturation and Therapeutic Effect on Cholestatic Liver Fibrosis
Source: MDPI journal article supplement (doi:10.3390/cells11142242), 2022-07-19
Supplement: s1 [file s1]

---

**Supplementary Materials for**

**Induced endothelial cell integrated liver assembloid  
promotes hepatic maturation and therapeutic effect on  
cholestatic liver fibrosis**

Donggyu Nam, Myung Rae Park, Hyunah Lee, Sung Chul Bae, Daniela Gerovska, Marcos J. Araúzo-Bravo, Holm Zaehres, Hans R. Schöler, Jeong Beom Kim\*

\*Corresponding author. Email: jbkim@unist.ac.kr

**This file includes:**

Figure S1 to S8  
Tables S1 and S2

**Other Supplementary Materials for this manuscript include the following:**

Video S1

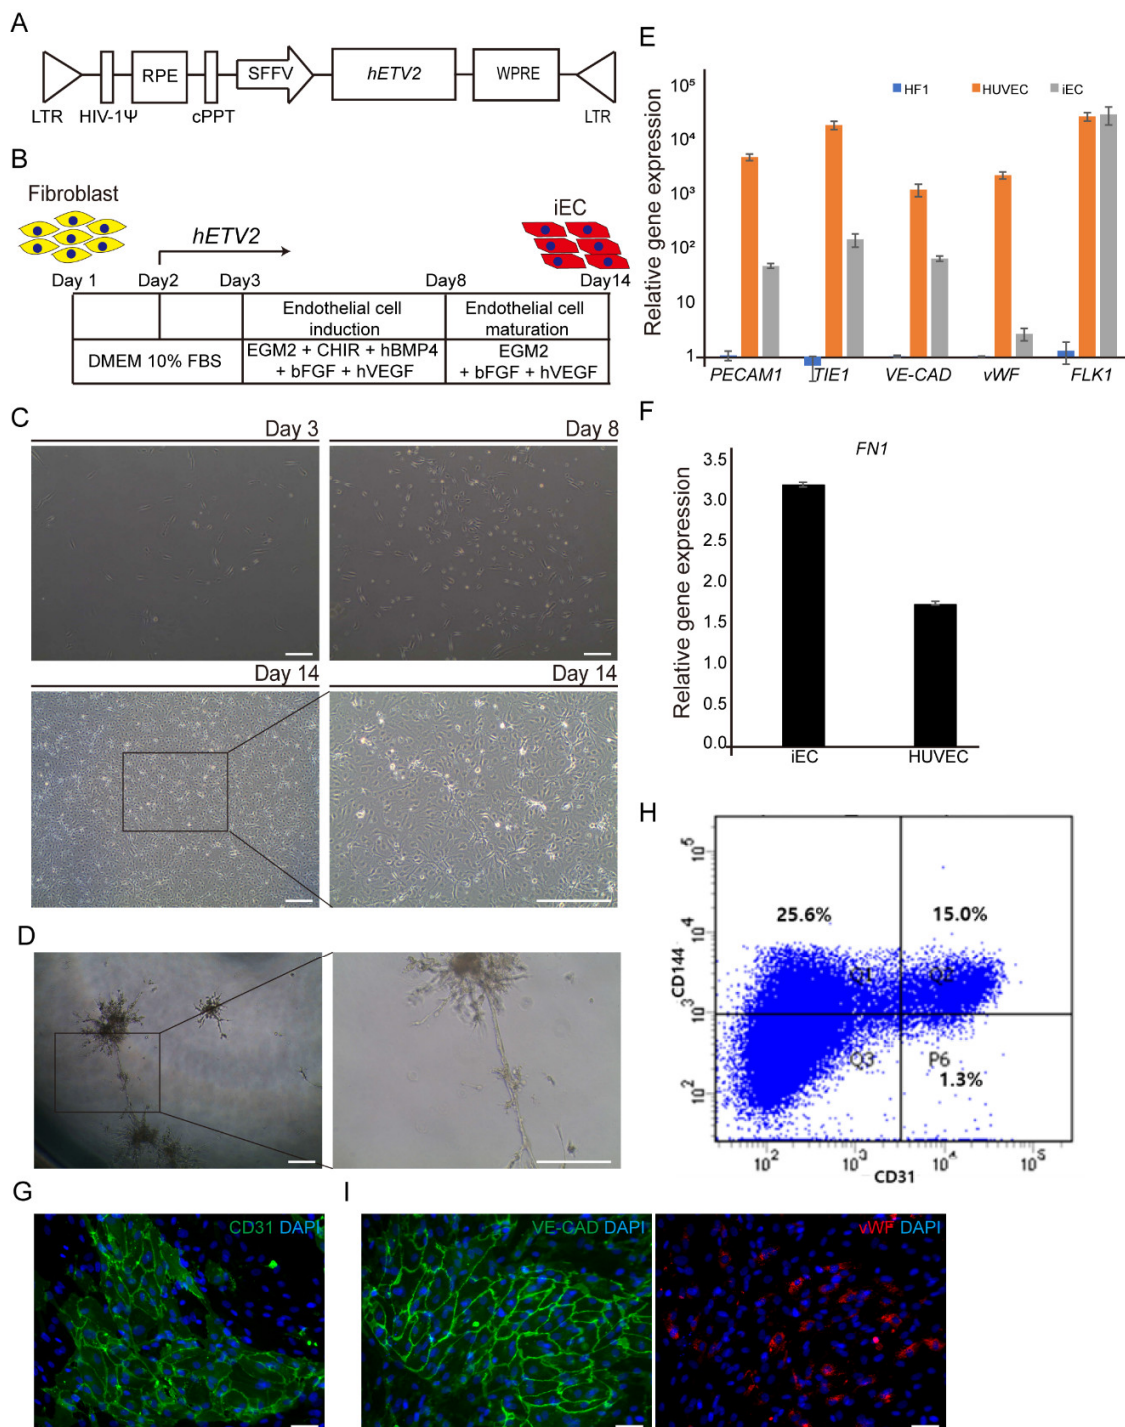

**Figure S1. Generation of induced endothelial cells (iEC).** (A) Schematic illustration of lenti-virus vector construct encoding *hETV2* transcription factor. (B) The experimental scheme for the generation of iEC from fibroblast. (C) The morphological change of human fibroblasts (HF1) into iEC during reprogramming. Emergence of cuboidal shaped cells after 14 days of *hETV2* infection in endothelial cell maturation medium. Scale bars: 250  $\mu$ m. (D) Tubule-like structure formation of iEC on Matrigel bed. Scale bars: 250  $\mu$ m. (E) Quantitative real-time PCR (qRT-PCR) analysis of endothelial cell-specific markers (*PECAM1*, *TIE1*, *VE-CAD*, *vWF*, and *FLK1*) in HF1, HUVEC and iEC relative to HF1. The transcriptional levels were normalized to the housekeeping gene (*GAPDH*). Error bars indicate standard

errors from triplicate samples ( $n = 3$ ). **(F)** *FN1* expression analysis of iECs and HUVEC relative to HF1. The transcriptional levels were normalized to the housekeeping gene (*GAPDH*). Error bars indicate standard errors from triplicate samples ( $n = 3$ ) **(G)** Immunofluorescence images of iECs stained with endothelial cell-specific markers (CD31). **(H)** Fluorescence-activated cell sorter (FACS) sorting CD144-positive cells and CD31-positive cells. **(I)** Immunofluorescence images of iECs sorted with CD144 and CD31, stained with endothelial cell-specific markers VE-CAD, and vWF.

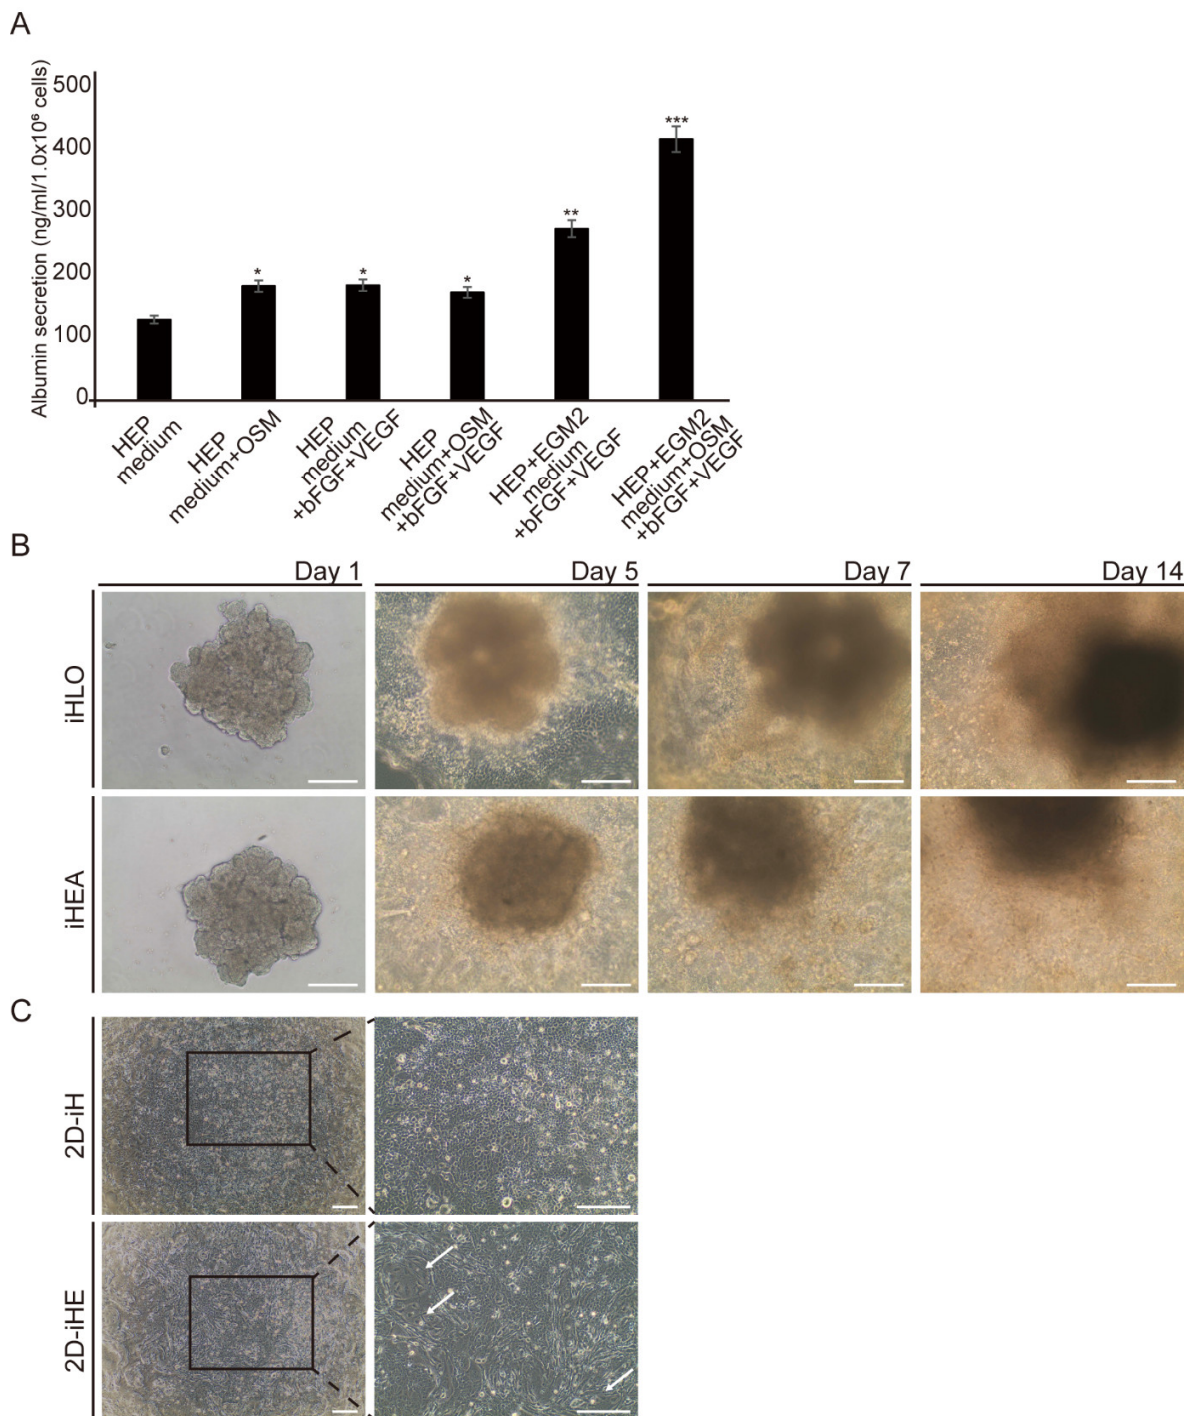

**Figure S2. Culture medium optimization for iHLO and iHEA.** (A) The amount of Albumin secretion of iHepSCs in different culture mediums were examined by ELISA. Error Bars indicate standard errors from triplicate samples ( $n = 3$ ).  $*p < 0.05$ ,  $**p < 0.005$ ,  $***p < 0.0005$ . (B) Microscopic images of the morphology of iHLO and iHEA on days 1 to 14 (scale bar: 250  $\mu\text{m}$ ). (C) Microscopic images of the morphology of 2D-iH and 2D-iHE. White arrows indicate iECs (scale bar: 250  $\mu\text{m}$ ).



A

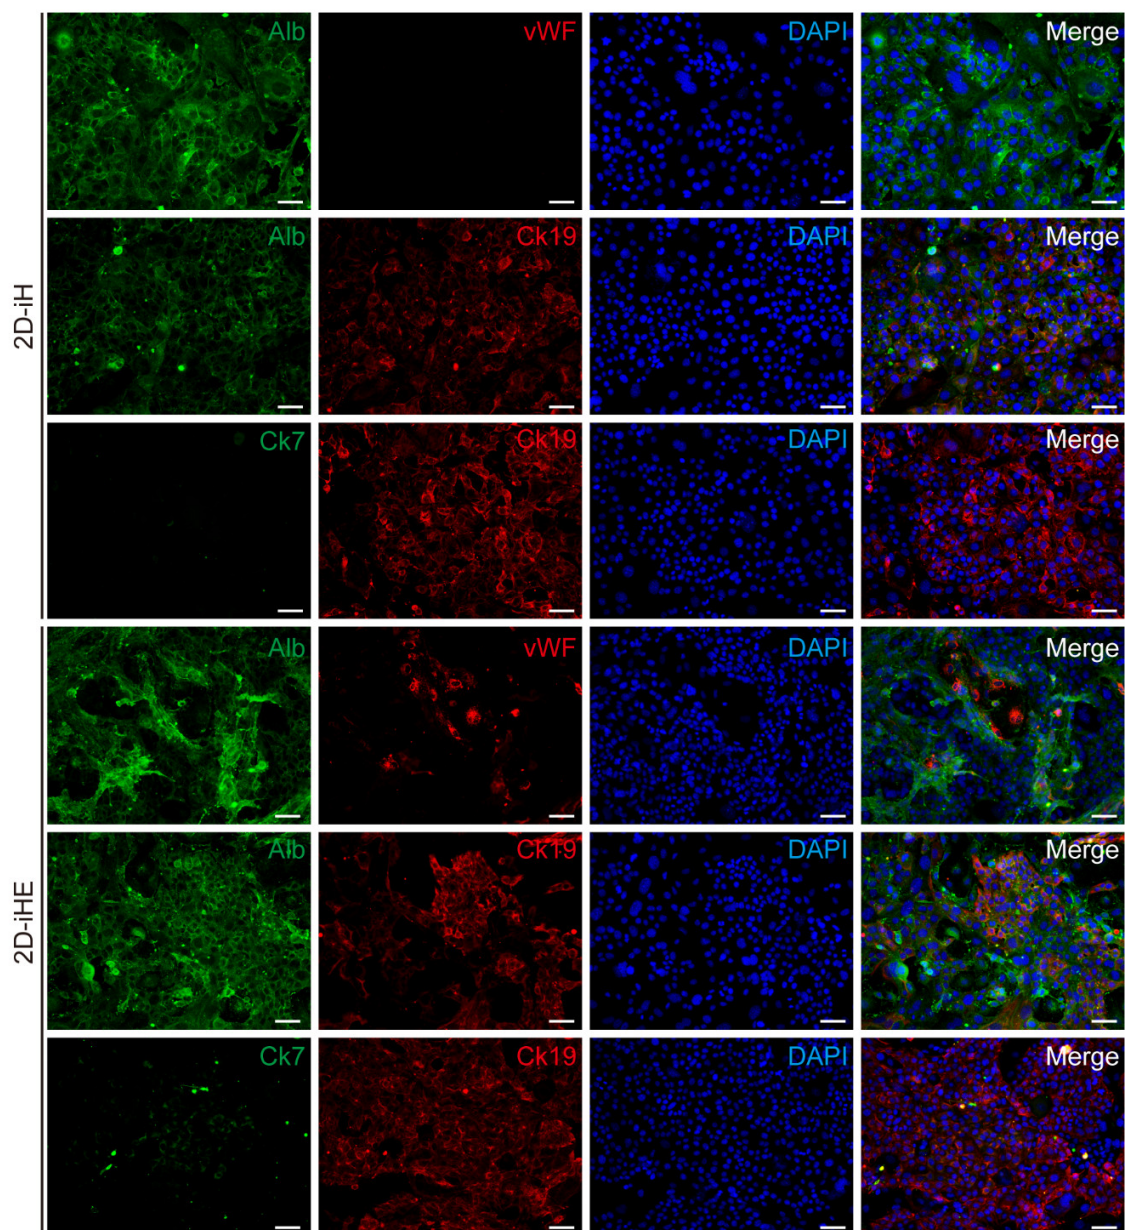

**Figure S3. Immunofluorescence analysis of 2D-iH and 2D-iHE with hepatic markers.** (A) Immunofluorescence images of 2D-iH and 2D-iHE stained with Hepatic lineage markers (Alb and Ck19), endothelial cell lineage markers (vWF) and cholangiocyte lineage markers (Ck19 and Ck7). The cells were counterstained with DAPI. Scale bar: 50  $\mu$ m.

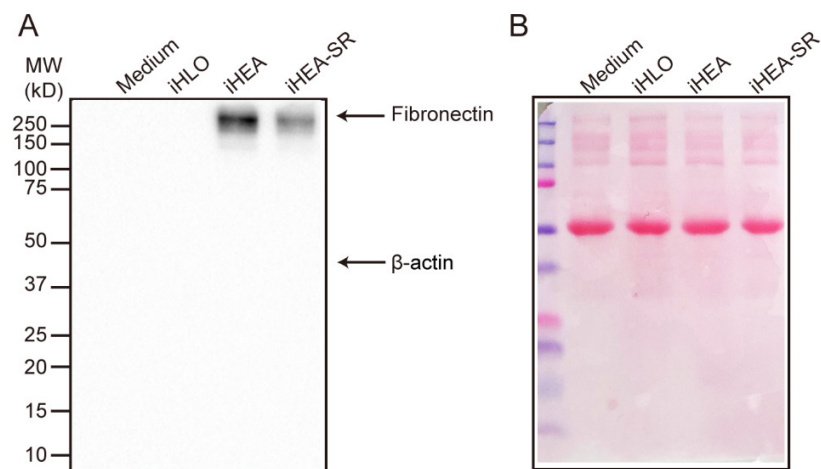

**Figure S4.** Effect of SR11302 on fibronectin secretion from iHEA. **(A)** Original blot data of conditioned mediums from iHLO, iHEA, iHEA treated with 10  $\mu$ M.SR11302 (iHEA-SR) detecting FN and  $\beta$ -actin expression. **(B)** Ponceau S staining of the blot used for loading control.

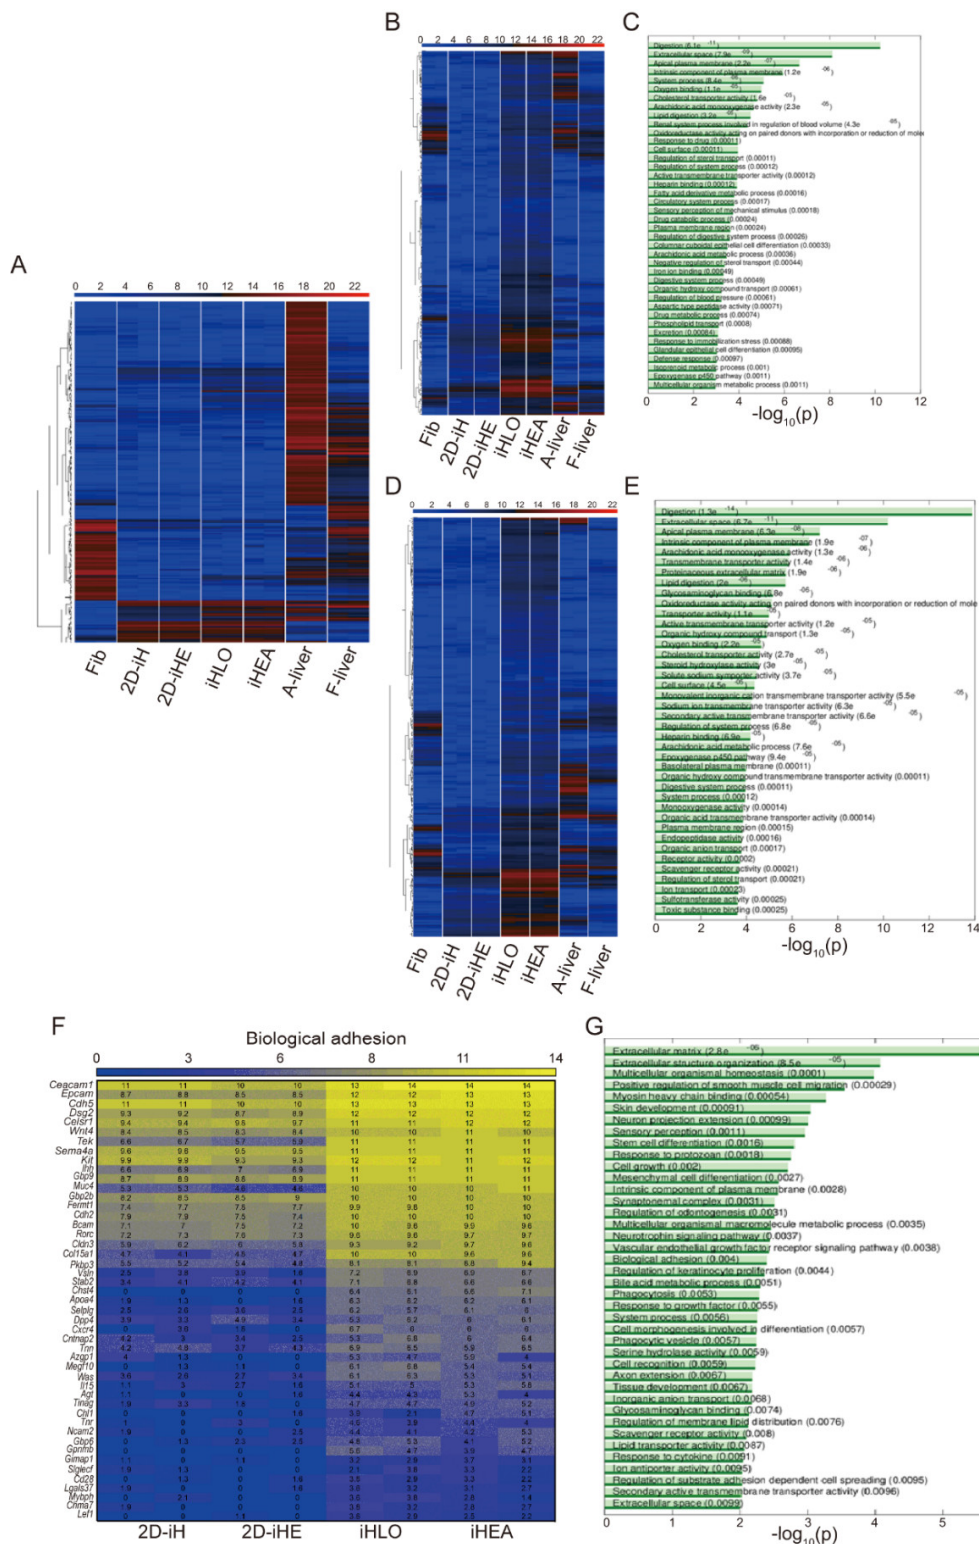

**Figure S5.** Transcriptome profile analysis of the 2D-iH, 2D-iHE, iHLO, and iHEA. (A) Heatmap analysis of global gene expression profiles in fibroblast (Fib), 2D-iH, 2D-iHE, iHLO, iHEA, adult liver (A-liver), and fetal liver (F-liver)

as determined by RNA-seq. The color bar codifies the gene expression in log2 scale. Red indicates upregulated genes and blue indicates downregulated genes. **(B)** Heatmap of differentially upregulated gene profiles in fibroblast (Fib), 2D-iH, 2D-iHE, iHLO, iHEA, A-liver and F-liver as determined by RNA-seq. The Heatmap represents differentially expressed genes between 2D-iH and iHLO. The color bar codifies the gene expression in log2 scale. Yellow indicates upregulated genes and blue indicates downregulated genes. **(C)** Functional enrichment analysis of 2D-iH and iHLO. Plot bar of the  $-\log_{10}(p)$  of the significantly enriched terms of 2D-iH- $\leftrightarrow$ 3D-iHLO-Log2(16). There are 309 differentially Down-regulated transcripts. The longer the bar, the higher is the statistical significance of the enrichment. The p-values are written in parenthesis. **(D)** Heatmap of differentially upregulated gene profiles in fibroblast (Fib), 2D-iH, 2D-iHE, iHLO, iHEA, A-liver, and F-liver as determined by RNA-seq. The Heatmap represents differentially expressed genes between 2D-iHE and iHEA. The color bar codifies the gene expression in log2 scale. Red indicates upregulated genes and blue indicates downregulated genes. **(E)** Functional enrichment analysis of 2D-iH and iHLO. Plot bar of the  $-\log_{10}(p)$  of the significantly enriched terms of 2D-iHE- $\leftrightarrow$ 3D-iHEA-Log2(16). There are 250 differentially Down-regulated transcripts. The longer the bar, the higher is the statistical significance of the enrichment. The p-values are written in parenthesis. **(F)** Heatmaps of differentially upregulated genes classified in GO functional category; "Biological adhesion". The color bar codifies the gene expression in log2 scale. Yellow indicates upregulated genes and blue indicates downregulated genes. **(G)** Functional enrichment analysis of iHLO and iHEA. Plot bar of the  $-\log_{10}(p)$  of the significantly enriched terms of iHLO- $\leftrightarrow$ iHEA-Log2(16). There are 116 differentially Down-regulated transcripts. The longer the bar, the higher is the statistical significance of the enrichment. The p-values are written in parenthesis.



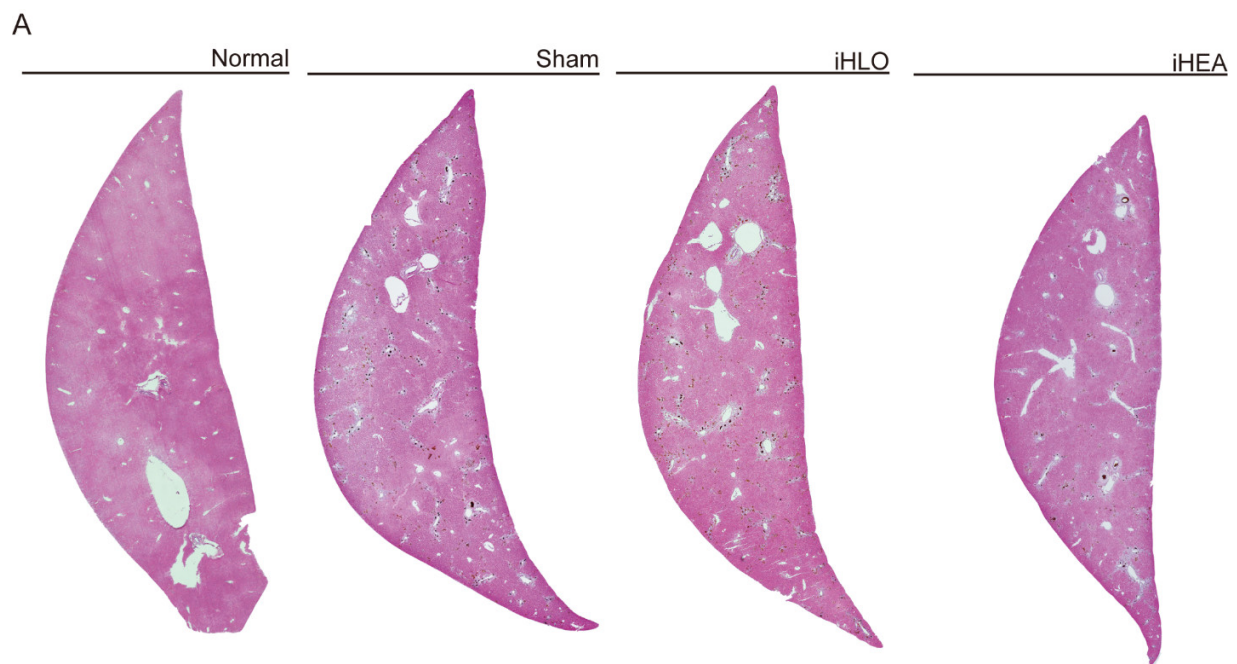

**Figure S6. H&E staining of whole liver section of DDC-induced cholestatic liver fibrosis mice. (A)** H&E staining images of whole liver section of DDC-induced cholestatic liver fibrosis mice model.

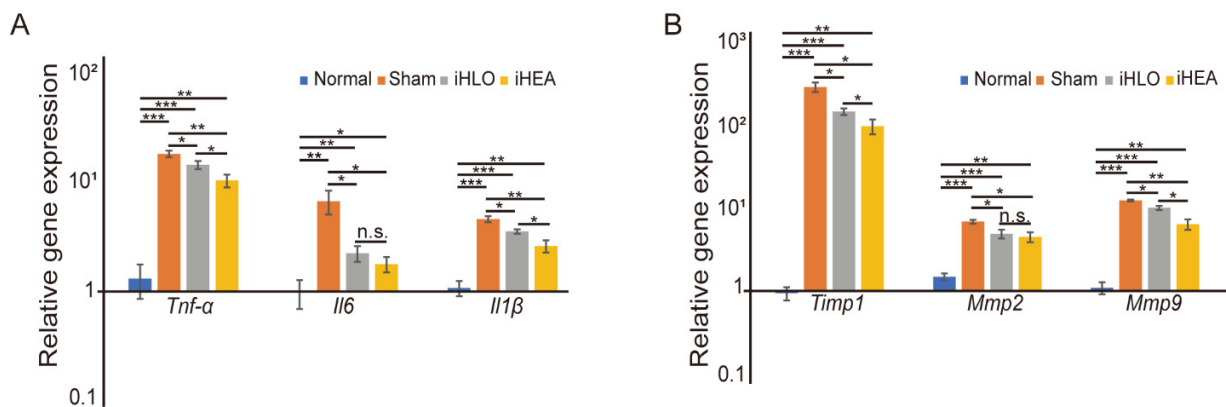

**Figure S7. Inflammatory response and ECM modulation related gene expression analysis on of liver lysates of iHLO or iHEA transplanted DDC-induced cholestatic liver fibrosis mice.** (A) qPCR analysis of inflammatory response including, Tumor necrosis factor-alpha: *Tnf-α*; Interleukin6: *Il6*; Interleukin1 beta: *Il1β* (B) ECM modulation including, Tissue inhibitor of metalloprotease protein1: *Timp1*; Matrix metalloproteinases2: *Mmp2*; Matrix metalloproteinase 9: *Mmp9* in sham, iHLO, iHEA transplanted liver tissues relative to normal liver tissues. The transcriptional levels were normalized to the housekeeping gene (*Gapdh*). Error bars indicate standard errors from samples (n=5 mice per group). \* $p < 0.05$ , \*\* $p < 0.005$ , \*\*\* $p < 0.0005$ , n.s.= not significant.

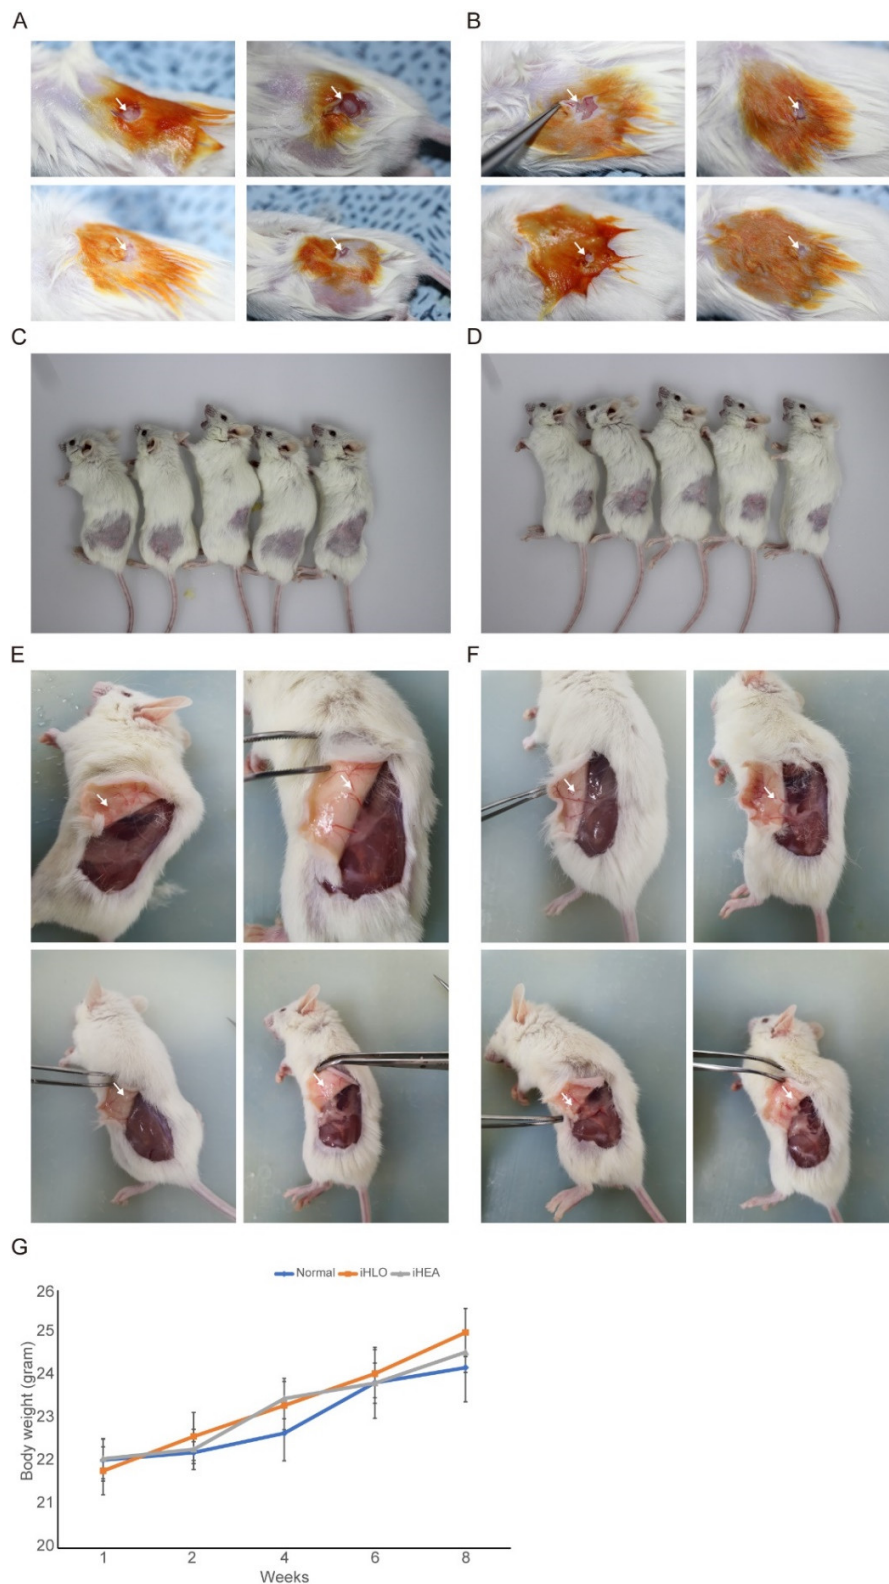

**Figure S8.** Tumorigenicity evaluation of iHLO or iHEA in NOD-SCID mice. (A) Images of subcutaneous transplantation of iHLO or (B) iHEA into the dorsal flanks of SCID mice (white arrows indicates iHLO or iHEA). (C)

Images of SCID mice at 8 weeks after subcutaneous transplantation of iHLO or (D) iHEA into the dorsal flanks (n = 5). (E) Autopsy images of iHLO or (F) iHEA transplanted SCID mice (white arrows indicate transplanted iHLO or iHEA). (G) Body weight changes of iHLO or iHEA transplanted SCID mice compared with normal SCID mice (n = 5 per group).

**Table S1.** Primers used for quantitative RT–PCT, RT–PCR.

| Gene                           | ACCESSION number | Sequence                         |
|--------------------------------|------------------|----------------------------------|
| <i>GAPDH</i>                   | NM_002046.7      | F: TGCCCCCATGTTTGTGAT            |
|                                |                  | R: TGTGGTCATGAGCCCTTC            |
| <i>FN1</i>                     | NM_002026.4      | F: GAAAGACCAGCAGAGGCATAA         |
|                                |                  | R: CACTCATCTCCAACGGCATAA         |
| <i>vWF</i>                     | NM_000552.5      | F: CTGGACGTGATCCTTCTCCT          |
|                                |                  | R: CTCAGCAAATGGGCTTCTC           |
| <i>PECAM1</i>                  | NM_000442.5      | F: GCTGACCCTTCTGCTCTGTT          |
|                                |                  | R: ATCTGGTGCTGAGGCTTGAC          |
| <i>TIE1</i>                    | NM_005424.5      | F: CCTGAGCTACCCAGTGCTAGA         |
|                                |                  | R: TTTCAGAGGCATACTCTTTCAGC       |
| <i>VE-CADHERIN</i>             | NM_001795.5      | F: CCCTTCTTCACCCAGACCAA          |
|                                |                  | R: CTCAACAAACAGAGAGCCCA          |
| <i>FLK1</i>                    | NM_002253.4      | F: CTACAAGACCAAAGGGGCAC          |
|                                |                  | R: CTCCTCCACAAATCCAGAGC          |
| <i>NOS3</i>                    | NM_000603.5      | F: GGGTCCTGTGTATGGATGAG          |
|                                |                  | R: GGGGCTGAAGATGTCTCGG           |
| <i>HGF</i>                     | NM_000601.6      | F: CGA GGT CTC ATG GAT CAT ACA G |
|                                |                  | R: GCC CTT GTC GGG ATA TCT TT    |
| <i>Alb</i>                     | NM_009654.4      | F: AGCAACTGAAGACTGTCATGG         |
|                                |                  | R: GGTGTGTTGTGATGTGTTTAG         |
| <i>Aat</i>                     | NM_009243.4      | F: TGATTTTGTGGAGAAGGGAACC        |
|                                |                  | R: TTCTCAGGATCGAATGGCTTC         |
| <i>Ttr</i>                     | NM_013697.5      | F: AATCGTACTGGAAGACACTTGG        |
|                                |                  | R: TGGTGCTGTAGGAGTATGGG          |
| <i>Hnf1<math>\alpha</math></i> | NM_009327.3      | F: GTTTTCCCAACCACTGCATC          |
|                                |                  | R: CCTCAGGCTTGTGGCTGTAT          |
| <i>Hnf4<math>\alpha</math></i> | NM_008261.3      | F: CTAACACGATGCCCTCTCAC          |
|                                |                  | R: GCAGGAGCTTGTAGGATTCAG         |
| <i>ItgaV</i>                   | NM_008402.3      | F: CCGTGGACTTCTTCGAGCC           |
|                                |                  | R: CTGTTGAATCAAACCTCAATGGGC      |
| <i>Itg<math>\beta</math>1</i>  | NM_010578.2      | F: ATGCCAAATCTTGCGGAGAAT         |



|                                |                |                               |
|--------------------------------|----------------|-------------------------------|
|                                |                | R: TTTGCTGCGATTGGTGACATT      |
| <i>Cdh1</i>                    | NM_009864.3    | F: CTCCAGTCATAGGGAGCTGTC      |
|                                |                | R: TCTTCTGAGACCTGGGTACAC      |
| <i>Cdh2</i>                    | NM_007664.5    | F: AGCGCAGTCTTACCGAAGG        |
|                                |                | R: TCGCTGCTTTCATACTGAACTTT    |
| <i>Ocln</i>                    | NM_008756.2    | F: CCATCTGACTATGCGGAAAAGAG    |
|                                |                | R: GCACCAGAGGTGTTGACTTAT      |
| <i>Acta2</i>                   | NM_007392.3    | F: TCCACCGCAAATGCTTCTAAG      |
|                                |                | R: TGTTGCTAGGCCAGGGCTAC       |
| <i>Col1a1</i>                  | NM_007742.4    | F: GACGCCATCAAGGTCTACTGC      |
|                                |                | R: GGAAGGTCAGCTGGATAGCG       |
| <i>Lox</i>                     | NM_010728.3    | F: CTCCTGGGAGTGGCACAG         |
|                                |                | R: CTTGCTTTGTGGCCTTCAG        |
| <i>Spp1</i>                    | NM_001204201.1 | F: CACTCCAATCGTCCCTACAGT      |
|                                |                | R: CTGGAAACTCCTAGACTTTGACC    |
| <i>Tnf-<math>\alpha</math></i> | NM_013693.3    | F: CTCTGTCTACTGAACTTCGGG      |
|                                |                | R: TGATCTGAGTGTGAGGGTCTG      |
| <i>Il6</i>                     | NM_031168.2    | F: GATAAGCTGGAGTCACAGAAGG     |
|                                |                | R: GGAATGTCCACAACTGATATGC     |
| <i>Il1<math>\beta</math></i>   | NM_008361.4    | F: ACGGACCCCCAAAAGATGAAG      |
|                                |                | R: TTCTCCACAGCCACAATGAG       |
| <i>Timp1</i>                   | NM_011593.2    | F: CTCAAAGACCTATAGTGCTGGC     |
|                                |                | R: CAAAGTGACGGCTCTGGTAG       |
| <i>Mmp2</i>                    | NM_008610.3    | F: ACCAAGAAGTCCGATTATCCC      |
|                                |                | R: CAGTACCAGTGTGAGTATCAGC     |
| <i>Mmp9</i>                    | NM_013599.4    | F: GATCCCCAGAGCGTCATTC        |
|                                |                | R: CCACCTTGTTACCTCATTTTG      |
| <i>Slco1a5</i>                 | NM_001267707.1 | F: CTGGTGCTCACTCATTCTAGTC     |
|                                |                | R: CCTTCCATTGCGACATTTAGG      |
| <i>Akr1d1</i>                  | NM_145364.2    | F: AGT CCA GAC TGC TCA CAA AC |
|                                |                | R: AGT CCA GAC TGC TCA CAA AC |
| <i>Acnat2</i>                  | NM_145368.3    | F: CAGTTGATAGCCACACCTTCA      |
|                                |                | R: CTGTTGCCTTGATGGTCACTA      |
| <i>Fsap</i>                    | NM_001329935.1 | F: GAACAGAGAGGCCTTCAACTAC     |
|                                |                | R: GAGAGCCCAATGACTGACTTC      |
| <i>Gapdh</i>                   | NM_001289726.1 | F: TGCCCCCATGTTTGTGAT         |
|                                |                | R: TGTGGTCATGAGCCCTTC         |

**Table S2.** List of antibodies used for Immunostaining.

| Antigen                                                                               | Source                   | Identifier                        | Isotype     | Dilution |
|---------------------------------------------------------------------------------------|--------------------------|-----------------------------------|-------------|----------|
| Anti-Mouse Serum Albumin antibody                                                     | Abcam                    | Cat# ab19194, RRID:AB_777886      | Goat IgG    | 1:400    |
| Anti-Von Willebrand Factor antibody                                                   | Abcam                    | Cat# ab6994, RRID:AB_305689       | Rabbit IgG  | 1:100    |
| Anti-Cytokeratin 19 antibody                                                          | Abcam                    | Cat# ab15463, RRID:AB_2281021     | Rabbit IgG  | 1:100    |
| Anti-Cytokeratin 7 antibody                                                           | Abcam                    | Cat# ab9021, RRID:AB_306947       | Mouse IgG   | 1:200    |
| Anti-CD31 antibody                                                                    | Abcam                    | Cat# ab9498, RRID:AB_307284       | Mouse IgG1  | 1:100    |
| Anti-PECAM-1 antibody                                                                 | Millipore                | Cat# MAB1398Z, RRID:AB_94207      | Hamster IgG | 1:200    |
| Anti-VE-cadherin antibody                                                             | Santa Cruz Biotechnology | Cat# sc-9989, RRID:AB_2077957     | Mouse IgG1  | 1:200    |
| Anti-Fibronectin antibody                                                             | Abcam                    | Cat# ab2413, RRID:AB_2262874      | Rabbit IgG  | 1:1000   |
| Anti- $\beta$ -actin                                                                  | Sigma                    | Cat# A1978, RRID:AB_476692        | Mouse IgG1  | 1:2000   |
| Anti-Human CD144 (VE-Cadherin) APC                                                    | eBioscience              | Cat# 17-1449-42, RRID:AB_10804754 | Mouse IgG1  | 1:200    |
| Anti-Human CD31 (PECAM-1) FITC                                                        | eBioscience              | Cat# 11-0319-42, RRID:AB_2043835  | Mouse IgG1  | 1:200    |
| Mouse IgG1 K Isotype Control FITC                                                     | eBioscience              | Cat# 11-4714-42, RRID:AB_10596964 | Mouse IgG1  | 1:200    |
| Mouse IgG1 K Isotype Control APC                                                      | eBioscience              | Cat# 17-4714-42, RRID:AB_1603315  | Mouse IgG1  | 1:200    |
| Donkey anti-Goat IgG (H+L) Cross-Adsorbed Secondary Antibody, Alexa Fluor 488         | Thermo Fisher Scientific | Cat# A-11055, RRID:AB_2534102     | Donkey IgG  | 1:1,000  |
| Goat anti-Rabbit IgG (H+L) Highly Cross-Adsorbed Secondary Antibody, Alexa Fluor 594, | Thermo Fisher Scientific | Cat# A-11037, RRID:AB_2534095     | Goat IgG    | 1:1,000  |
| Goat anti-Mouse IgG (H+L) Cross-Adsorbed Secondary Antibody, Alexa Fluor 488          | Thermo Fisher Scientific | Cat# A-11001, RRID:AB_2534069     | Goat IgG    | 1:1,000  |
| Donkey anti-Mouse IgG (H+L) ReadyProbes™ Secondary Antibody, Alexa Fluor 594          | Thermo Fisher Scientific | Cat# R37115, RRID:AB_2556543      | Donkey IgG  | 1:1,000  |

|                                                                                                 |                             |                                   |            |         |
|-------------------------------------------------------------------------------------------------|-----------------------------|-----------------------------------|------------|---------|
| Fluorescein (FITC)-AffiniPure Goat Anti-Armenian Hamster IgG (H+L) (min X Bov Sr Prot) antibody | Jackson ImmunoResearch Labs | Cat# 127-095-099, RRID:AB_2338981 | Goat IgG   | 1:1,000 |
| Goat anti-Mouse IgG(H+L)-HRP                                                                    | GeneDEPOT                   | Cat# SA001-500                    | Mouse IgG  | 1:5,000 |
| Goat anti-Rabbit IgG(H+L)-HRP                                                                   | GeneDEPOT                   | Cat# SA002-500                    | Rabbit IgG | 1:5,000 |

**Video S1.**

Surgery procedure of transplantation of iHLO/iHEA in DDC-induced cholestatic liver fibrosis mice model.
